# Supplementary material
Source: PubMed Central journal article supplement (PMC3535981)
Supplement: AAC.01689-12_zac999101533so1.pdf [file AAC.01689-12_zac999101533so1.pdf]

Supplemental Table S1. PCR primers used to characterize the novel composite pseudo *SCC<sub>mec</sub>-SCC-SCC<sub>CRISPR</sub>* element in ST779/t878 MRSA isolates and for confirmation of ambiguous DNA microarray results

| Primer application                                                                                                           | Primer pair | Nucleotide sequence (5'-3') | Nucleotide coordinates   | Expected amplicon size (bp) | Reference  |
|------------------------------------------------------------------------------------------------------------------------------|-------------|-----------------------------|--------------------------|-----------------------------|------------|
| Confirmation of the genetic organization of the pseudo <i>SCC<sub>mec</sub>-SCC-SCC<sub>CRISPR</sub></i> element in M06/0171 | 276F        | GAATCAACGCATGACCCAAGG       | 276-296 <sup>a</sup>     | 2295                        | This study |
|                                                                                                                              | dru 5'      | GTTAGCATATTACCTCTCCTTGC     | 2548-2570 <sup>a</sup>   |                             | (1)        |
|                                                                                                                              | dru 3'      | GCCGATTGTGCTTGATGAG         | 1766-1784 <sup>a</sup>   | 3075                        | (1)        |
|                                                                                                                              | mA1         | TGCTATCCACCCTCAAACAGG       | 4840-4820 <sup>a</sup>   |                             | (2)        |
|                                                                                                                              | mA2         | AACGTTGTAACCACCCAAGA        | 4555-4575 <sup>a</sup>   | 6074                        | (2)        |
|                                                                                                                              | far476R     | GATTATTTATATCATCTAGG        | 10628-10609 <sup>a</sup> |                             | (3)        |
|                                                                                                                              | far476F     | AGTAAAGCAGTTAGTATATC        | 10051-10070 <sup>a</sup> | 6936                        | (3)        |
|                                                                                                                              | 169R        | TTCTAAATATTTTCATCTTGGCTA    | 16986-16964 <sup>a</sup> |                             | This study |
|                                                                                                                              | 154F        | TGATTGCTCAAGGAGATCAAATTAA   | 15416-15440 <sup>a</sup> | 11624                       | This study |
|                                                                                                                              | 270R        | ATTGGTATGTTAAACTATTTTAAA    | 27039-27016 <sup>a</sup> |                             | This study |

| Primer application                                                                                                                          | Primer pair | Nucleotide sequence (5'-3') | Nucleotide coordinates   | Expected amplicon size (bp) | Reference  |
|---------------------------------------------------------------------------------------------------------------------------------------------|-------------|-----------------------------|--------------------------|-----------------------------|------------|
|                                                                                                                                             | β4U         | ATCGCTCCAGTGTCTATACTTCGC    | 30547-30570 <sup>a</sup> | 10405                       | (2)        |
|                                                                                                                                             | γR          | CCTTTATAGACTGGATTATTCAAATAT | 40951-40924 <sup>a</sup> |                             | (2)        |
|                                                                                                                                             | 407F        | ATATTGTACGTGAAATTTTCGATT    | 40795-40818 <sup>a</sup> | 5310                        | This study |
|                                                                                                                                             | 461R        | ATTATAGGCATATTTACACTACG     | 46104-46081 <sup>a</sup> |                             | This study |
|                                                                                                                                             | 452F        | ATCTCGTCAACTTGTTGGCGAGAT    | 45279-45302 <sup>a</sup> | 6332                        | This study |
|                                                                                                                                             | 516R        | ATGATACGCCTCTCCCTATCAGTG    | 51610-51633 <sup>a</sup> |                             | This study |
| Amplification and sequencing of the CRISPR region of the pseudo <i>SCC<sub>mec</sub></i> - <i>SCC</i> - <i>SCC<sub>CRISPR</sub></i> element | CRISPR_F    | ACCTGTTCCGGTCATTGTTCTAAC    | 50374-50397 <sup>a</sup> | 1560                        | This study |
|                                                                                                                                             | CRISPR_R    | ATCTATTTTCAATCTCAAACATTA    | 51910-51933 <sup>a</sup> |                             | This study |
| Amplification of the <i>mec</i> complex of the pseudo <i>SCC<sub>mec</sub></i> - <i>SCC</i> - <i>SCC<sub>CRISPR</sub></i> element           | C2F         | TATTAATAAAGTGGAACAAT        | 5848-5868 <sup>a</sup>   | 17911                       | This study |
|                                                                                                                                             | C70R        | TAAAGTTTCTTGCCCATACCTTGT    | 7003-7026 <sup>a</sup>   |                             | This study |

| Primer application                                                            | Primer pair   | Nucleotide sequence (5'-3') | Nucleotide coordinates | Expected amplicon size (bp) | Reference  |
|-------------------------------------------------------------------------------|---------------|-----------------------------|------------------------|-----------------------------|------------|
| Amplification of genes yielding ambiguous results by DNA microarray profiling | <i>seb-1</i>  | TCGCATCAAACCTGACAAACG       | N/A                    | 477                         | (4)        |
|                                                                               | <i>seb-4</i>  | GCAGGTACTCTATAAGTGCCTGC     | N/A                    |                             | (4)        |
|                                                                               | <i>sdrD-F</i> | ACTGCTAACATTCAATATCC        | 1261-1280 <sup>b</sup> | 1289                        | This study |
|                                                                               | <i>sdrD-R</i> | ATGTAACCTGTTACGCCT          | 2566-2550 <sup>b</sup> |                             |            |
|                                                                               | <i>clfB-F</i> | AGTTCTTACCTGTATTGTC         | 1344-1362 <sup>b</sup> | 598                         | This study |
|                                                                               | <i>clfB-R</i> | AAGCAACATATGATATC           | 1958-1942 <sup>b</sup> |                             |            |

<sup>a</sup> Nucleotide coordinates based on the nucleotide sequence of the composite pseudo *SCCmec-SCC-SCC<sub>CRISPR</sub>* element of MRSA isolate M06/0171 (GenBank accession number HE980450).

<sup>b</sup> Nucleotide coordinates based on the nucleotide sequence of the *S. aureus* strain COL (GenBank accession number CP000046).

## REFERENCES

1. Goering RV, Morrison D, Al-Doori Z, Edwards GF, Gemmell CG. 2008. Usefulness of *mec*-associated direct repeat unit (*dru*) typing in the epidemiological analysis of highly clonal methicillin-resistant *Staphylococcus aureus* in Scotland. *Clin. Microbiol. Infect.* **14**:964-969.

2. **Kondo Y, Ito T, Ma XX, Watanabe S, Kreiswirth BN, Etienne J, Hiramatsu K.** 2007. Combination of multiplex PCRs for staphylococcal cassette chromosome *mec* type assignment: rapid identification system for *mec*, *ccr*, and major differences in junkyard regions. *Antimicrob. Agents Chemother.* **51**:264-274.
3. **Scicluna EA, Shore AC, Thurmer A, Ehricht R, Slickers P, Borg MA, Coleman DC, Monecke S.** 2010. Characterisation of MRSA from Malta and the description of a Maltese epidemic MRSA strain. *Eur. J. Clin. Microbiol. Infect. Dis.* **29**:163-170.
4. **Holmes A, Ganner M, McGuane S, Pitt TL, Cookson BD, Kearns AM.** 2005. *Staphylococcus aureus* isolates carrying Panton-Valentine leucocidin genes in England and Wales: frequency, characterization, and association with clinical disease. *J. Clin. Microbiol.* **43**:2384-2390.

Supplemental Table S2. Location of open reading frames (ORFs), predicted gene products and comparison with similar ORFs in GenBank for the pseudo SCC<sub>mec</sub>-SCC-SCC<sub>CRISPR</sub> element of MRSA isolate M06/0171

| <b>ORF/DR</b>                               | <b>Nucleotide coordinates</b> | <b>Comparative ORF (GenBank accession number)</b>                                        | <b>Protein accession number</b> | <b>% amino acid identity</b> | <b>Gene product/DR nucleotide sequence</b>                                     |
|---------------------------------------------|-------------------------------|------------------------------------------------------------------------------------------|---------------------------------|------------------------------|--------------------------------------------------------------------------------|
| <b>ORF_100</b><br>( <i>orfX</i> )           | 1-480                         | MRSA strain Mu50 (NC_002758.2)                                                           | NP_370548.1                     | 99%                          | 23S rRNA methyltransferase (formerly known as open reading frame <i>orfX</i> ) |
| <b>DR1</b>                                  | 462-478                       | n/a                                                                                      | n/a                             | n/a                          | AGAAGCTTATCATAAAT                                                              |
| <b>ORF_101</b><br>( <i>tnp</i> )            | 659-1333<br>(complement)      | <i>Staphylococcus aureus</i> strain 45394F, SCC45394F/SCC <sub>mec</sub> IVk, (GU122149) | ADC40007.1                      | 99%                          | Transposase for IS431                                                          |
| <b>ORF_102</b><br>( <i>mvas</i> truncated)  | 1406-1758                     | <i>Staphylococcus epidermidis</i> BCM-HMP0060 (NZ_ACHE01000054)                          | ZP_04825712                     | 100%                         | Hydroxymethylglutaryl-CoA synthase N-domain                                    |
| <b>dru region</b>                           | 2004-2361                     | n/a                                                                                      | n/a                             | n/a                          | Direct repeat unit ( <i>dru</i> )                                              |
| <b>ORF_103</b><br>( <i>ugpQ</i> )           | 2563-3306                     | <i>S. aureus</i> strain MU50 (NC_002758.2)                                               | NP_370563.1                     | 100%                         | Glycerophosphory diester phosphodiesterase                                     |
| <b>ORF_104</b>                              | 3403-3831                     | <i>S. aureus</i> strain MU50 (NC_002758.2)                                               | NP_370564.1                     | 100%                         | MaoC-like domain protein                                                       |
| <b>ORF_105</b><br>( <i>mecA</i> )           | 3877-5883<br>(complement)     | <i>S. aureus</i> SCC <sub>mec</sub> X (AB505630)                                         | BAK53145.1                      | 100%                         | Penicillin-binding protein 2a                                                  |
| <b>ORF_106</b><br>( $\Delta$ <i>mecR1</i> ) | 5983-5999<br>(complement)     | <i>S. aureus</i> SCC <sub>mec</sub> X (AB505630)                                         | BAK53145.1                      | 100%                         | Methicillin resistance regulatory sensor-transducer MecR1                      |
| <b>ORF_107</b><br>( <i>tnp</i> )            | 6076-6750<br>(complement)     | <i>S. aureus</i> strain 71193 (CP003045.1)                                               | AFH70044                        | 99%                          | Transposase for IS431                                                          |
| <b>ORF_108</b>                              | 6928-8868                     | <i>S. epidermidis</i> strain VCU120 (AHL01000034.1)                                      | EHR82817.1                      | 99%                          | DEAD/DEAH box helicase domain protein                                          |
| <b>ORF_109</b>                              | 9125-9433                     | MSSA476 (NC_002953.3)                                                                    | YP_042172                       | 98%                          | Hypothetical protein (SAS0040)                                                 |

| <b>ORF/DR</b>                     | <b>Nucleotide coordinates</b> | <b>Comparative ORF (GenBank accession number)</b>          | <b>Protein accession number</b> | <b>% amino acid identity</b> | <b>Gene product/DR nucleotide sequence</b>                                |
|-----------------------------------|-------------------------------|------------------------------------------------------------|---------------------------------|------------------------------|---------------------------------------------------------------------------|
| <b>ORF_110</b>                    | 9543-9701                     | <i>S. aureus</i> strain 45394F, (GU122149.1)               | ADC40000.1                      | 100%                         | Hypothetical protein (ORF022)                                             |
| <b>ORF_111</b><br>( <i>fusC</i> ) | 10019-10657                   | <i>S. aureus</i> strain MSSA476 (NC_002953.3)              | YP_042173                       | 100%                         | Fusidic acid resistance protein                                           |
| <b>ORF_112</b><br>( <i>copB</i> ) | 10962-12921<br>(complement)   | <i>S. epidermidis</i> VCU120 (AHL01000034.1)               | EHR82803                        | 99%                          | Putative copper exporting ATPase                                          |
| <b>ORF_113</b><br>( <i>tnp</i> )  | 12978-13652                   | <i>S. aureus</i> strain Mu50 (NC_002758.2)                 | NP_370551                       | 100%                         | Transposase for IS431                                                     |
| <b>ORF_114</b><br>( <i>copC</i> ) | 13915-15975                   | <i>S. aureus</i> strain, JCSC6945 (AB505630)               | BAK53188                        | 100%                         | P-ATPase superfamily P-type ATPase copper (Cu <sup>2+</sup> ) transporter |
| <b>ORF_115</b>                    | 15993-16538                   | <i>S. aureus</i> strain USA300_FPR3757 (NC_007793.1)       | YP_492797                       | 99%                          | Putative lipoprotein                                                      |
| <b>DR2</b>                        | 16743-16759                   | n/a                                                        | n/a                             | n/a                          | AGAAGCGTACCACAAAT                                                         |
| <b>ORF_116</b>                    | 17439-18344                   | <i>S. epidermidis</i> strain VCU129 (AHLJ01000021.1)       | EHS01958.1                      | 93%                          | <i>ApbE</i> family protein                                                |
| <b>ORF_117</b>                    | 18427-21444                   | <i>S. epidermidis</i> strain RP62A (NC_002976.3)           | YP_189929.1                     | 96%                          | Putative NADH-dependent flavin oxidoreductase                             |
| <b>ORF_118</b>                    | 21473-22849                   | <i>S. epidermidis</i> strain BCM-HMP0060 (NZ_ACHE01000077) | ZP_04826005                     | 94%                          | Putative drug transporter<br>Quinolone resistance protein NorB            |
| <b>ORF_119</b><br>( <i>speG</i> ) | 23471-23968<br>(complement)   | <i>S. epidermidis</i> strain ATCC 12228                    | NP_763601                       | 99%                          | Spermidine acetyltransferase                                              |
| <b>ORF_120</b>                    | 24376-24843<br>(complement)   | <i>Staphylococcus haemolyticus</i> strain                  | YP_251974.1                     | 98%                          | Hypothetical protein                                                      |

| ORF/DR                             | Nucleotide coordinates       | Comparative ORF (GenBank accession number)                                  | Protein accession number | % amino acid identity | Gene product/DR nucleotide sequence                                                                       |
|------------------------------------|------------------------------|-----------------------------------------------------------------------------|--------------------------|-----------------------|-----------------------------------------------------------------------------------------------------------|
|                                    |                              | JCSC1435 (NC_007168)                                                        |                          |                       |                                                                                                           |
| <b>ORF_121</b>                     | 24858-25196<br>(complement)  | <i>S. aureus</i> strain 45394F ,<br>SCC45394F and<br>SCCmecIVk (GU122149.1) | ADC39991                 | 93%                   | Hypothetical protein                                                                                      |
| <b>ORF_122</b>                     | 25256..25646<br>(complement) | <i>S. aureus</i> strain<br>USA300_FPR3757<br>(NC_007793.1)                  | YP_492778.1              | 91%                   | Hypothetical protein                                                                                      |
| <b>ORF_123</b><br>( <i>nupC2</i> ) | 26167-27348<br>(complement)  | <i>Staphylococcus lugdunensis</i><br>strain HKU09-01<br>(NC_013893)         | YP_003470547             | 83%                   | Nucleoside transporter                                                                                    |
| <b>ORF_124</b><br>( <i>indA</i> )  | 27359-28270<br>(complement)  | <i>S. lugdunensis</i> strain<br>M23590<br>(NZ_AEQA01000015.1)               | ZP_07912579.1            | 79%                   | Indigoidine synthase A (indA) family protein                                                              |
| <b>ORF_125</b>                     | 28254-29363<br>(complement)  | <i>S. lugdunensis</i> M23590<br>(NZ_AEQA01000015.1)                         | ZP_07912578.1            | 67%                   | PfkB family carbohydrate kinase                                                                           |
| <b>ORF_126</b><br>( <i>ccrB4</i> ) | 29593-31281<br>(complement)  | <i>S. haemolyticus</i> strain<br>MCS13 (AB587081.1)                         | BAJ53095                 | 98%                   | Cassette chromosome recombinase B4                                                                        |
| <b>ORF_127</b><br>( <i>ccrA4</i> ) | 31278-32639<br>(complement)  | <i>S. aureus</i> strain CHE482<br>(EF126185)                                | ABL75417.1               | 93%                   | Cassette chromosome recombinase A4, has a<br>premature stop codon at position 32310-32312<br>(complement) |
| <b>ORF_128</b>                     | 32894-34186                  | <i>Staphylococcus hominis</i><br>VCU122 (AHL01000058)                       | EHR87795.1               | 94%                   | FMN-dependent oxidoreductase, nitrilotriacetate<br>monooxygenase family                                   |
| <b>DR3</b>                         | 34208-34231                  | n/a                                                                         | n/a                      | n/a                   | AGAAGCTTATCACAAAT                                                                                         |
| <b>ORF_129</b>                     | 34320-34949                  | <i>S. epidermidis</i> strain ATCC<br>12228 (AE015929)                       | AAO03695.1               | 95%                   | Conserved hypothetical protein                                                                            |
| <b>ORF_130</b>                     | 35215-36690                  | <i>S. saprophyticus</i> strain<br>ATCC 15305<br>(NC_007350.1)               | YP_300132                | 92%                   | Hypothetical protein (SSP0042)                                                                            |

| <b>ORF/DR</b>                          | <b>Nucleotide coordinates</b> | <b>Comparative ORF (GenBank accession number)</b>                                                | <b>Protein accession number</b>                               | <b>% amino acid identity</b> | <b>Gene product/DR nucleotide sequence</b>                                                                               |
|----------------------------------------|-------------------------------|--------------------------------------------------------------------------------------------------|---------------------------------------------------------------|------------------------------|--------------------------------------------------------------------------------------------------------------------------|
| <b>ORF_131</b>                         | 36916-38016                   | <i>S. saprophyticus</i> strain ATCC 15305 (NC_007350.1)                                          | YP_300133.1                                                   | 90%                          | Hypothetical protein (SSP0043)                                                                                           |
| <b>ORF_132</b><br>( <i>ccrAA</i> )     | 38377-40020                   | <i>S. aureus</i> strains M013 (NC_016928.1), T0131 (NC_017347) and ATCC BAA-39 (NZ_AEEK01000037) | YP_005296507.1, YP_005753915.1 and ZP_07362708.1 respectively | 89%                          | Hypothetical protein located adjacent to <i>ccrC</i>                                                                     |
| <b>ORF_133</b><br>( <i>ccrCI</i> )     | 40245-41924                   | <i>S. aureus</i> strain UMCg-M4 (GQ902038)                                                       | ADC79473                                                      | 95%                          | Cassette chromosome recombinase C1                                                                                       |
| <b>ORF_134</b>                         | 42013-42351                   | <i>S. haemolyticus</i> strain JCSC1435 (NC_007168)                                               | YP_251972.1                                                   | 96%                          | Hypothetical protein                                                                                                     |
| <b>ORF_135</b>                         | 42445-42756                   | <i>S. pseudintermedius</i> strain 06-3228 (FJ544922)                                             | ACL99846                                                      | 99%                          | Hypothetical protein                                                                                                     |
| <b>ORF_136</b>                         | 42771-43274                   | <i>S. pseudintermedius</i> strain 06-3228 (FJ544922.1)                                           | ACL99847.1                                                    | 99%                          | Hypothetical protein                                                                                                     |
| <b>ORF_137</b>                         | 43731-44543                   | <i>S. epidermidis</i> strain VCU117 (AHLA01000056)                                               | EHR83751                                                      | 96%                          | Hypothetical protein                                                                                                     |
| <b>ORF_138</b>                         | 44760-45015                   | <i>S. aureus</i> strain T0131 (YP_005753900)                                                     | YP_005753900.1                                                | 64%                          | Type I site-specific restriction-modification system, R (restriction) subunit and related helicases [Defense mechanisms] |
| <b>ORF_139</b><br>( <i>cas9/csn1</i> ) | 45349-48510                   | <i>S. lugdunensis</i> strain M23590 (NZ_AEQA01000016)                                            | ZP_07912707                                                   | 63%                          | CRISPR-associated protein Cas9/Csn1                                                                                      |
| <b>ORF_140</b><br>( <i>cas 1</i> )     | 48518-49423                   | <i>S. lugdunensis</i> strain M23590 (NZ_AEQA01000016)                                            | ZP_07912706                                                   | 68%                          | CRISPR-associated protein Cas 1                                                                                          |
| <b>ORF_141</b><br>( <i>cas2</i> )      | 49435-49743                   | <i>S. lugdunensis</i> strain M23590 (NZ_AEQA01000016)                                            | ZP_07912705.1                                                 | 70%                          | CRISPR-associated protein Cas 2                                                                                          |



| <b>ORF/DR</b>  | <b>Nucleotide coordinates</b> | <b>Comparative ORF (GenBank accession number)</b>     | <b>Protein accession number</b> | <b>% amino acid identity</b> | <b>Gene product/DR nucleotide sequence</b>                         |
|----------------|-------------------------------|-------------------------------------------------------|---------------------------------|------------------------------|--------------------------------------------------------------------|
| <b>ORF_142</b> | 49754-50743                   | <i>S. lugdunensis</i> strain M23590 (NZ_AEQA01000016) | ZP_07912704.1                   | 44%                          | CRISPR-associated conserved hypothetical protein                   |
| <b>CRISPR</b>  | 50774-51601                   | n/a                                                   | n/a                             | n/a                          | Clustered Regularly Interspaced Short Palindromic Repeats (CRISPR) |
| <b>DR4</b>     | 51614-51637                   | n/a                                                   | n/a                             | n/a                          | AGAGGCGTATCATAAGT                                                  |

Abbreviations: ORF, open reading frame; DR, direct repeat; n/a, not applicable.
